# Supplementary material
Source: PubMed Central journal article supplement (PMC3243559)

**CuII(at5m) protects against peroxynitrite-induced nitrosative damage and prolongs survival in an amyotrophic lateral sclerosis mouse model**

Cynthia P.W. Soon<sup>1,2</sup>, Paul S. Donnelly<sup>3,4</sup>, Bradley J. Turner<sup>5</sup>, Lin W. Hung<sup>1,2,4</sup>, Peter J. Crouch<sup>1,2,5</sup>, Nicki A. Sherratt<sup>1,2,4</sup>, Jiang-Li Tan<sup>1</sup>, Nastasia K-H Lim<sup>1,2,5</sup>, Linh Lam<sup>2</sup>, Laura Bica<sup>1</sup>, SinChun Lim<sup>3,4</sup>, James L. Hickey<sup>3,4</sup>, Julia Morizzi, Andrew Powell<sup>7</sup>, David I. Finkelstein<sup>2</sup>, Janetta G. Culvenor<sup>1,5</sup>, Colin L. Masters<sup>2</sup>, James Duce<sup>2</sup>, Anthony R. White<sup>1,2,5</sup>, Kevin J. Barnham<sup>1,2,4#</sup>, and Qiao-Xin Li<sup>1,2,5#</sup>

**Supporting Online Material**

**Table S1: Mouse cohorts used in the Cu<sup>II</sup>(at5m) treatment survival study**

| Group                        | Pre-symptomatic (140 days) | Symptomatic (200 days) |
|------------------------------|----------------------------|------------------------|
| <b>Wild-type:</b>            |                            |                        |
| <b>Vehicle</b>               | n=5 (3m,2f)                | not included           |
| <b>Cu<sup>II</sup>(at5m)</b> | n=5 (1m,4f)                |                        |
| <b>SOD1<sup>G93A</sup></b>   |                            |                        |
| <b>Vehicle</b>               | n=18 (10m,8f)              | n=14 (6m,8f)           |
| <b>Cu<sup>II</sup>(at5m)</b> | n=14 (7m,7f)               | n=13 (5m,8f)           |

**Table S2. In vivo concentration of Cu<sup>II</sup>(at5m) 2 hr after gavage**

| Mouse Strain                     | Plasma (ng/ml) | Brain (ng/g) | Spinal cord (ng/g) |
|----------------------------------|----------------|--------------|--------------------|
| <b>WT (n=6)</b>                  | 303.6 (21.2)   | 69.2 (26)    | 18.8 (9.9)         |
| <b>SOD1<sup>G93A</sup> (n=3)</b> | 331.9 (9.5)    | 67.2 (13.5)  | 15.1 (3.2)         |

Data are expressed as mean with % standard deviation. No detectable Cu<sup>II</sup>(at5m) was found in mice gavaged with the vehicle.

**Supplementary figure legend**

**Figure S1.** ONOO<sup>-</sup> has neither any interference at 400 nM (absorbance of pyrogallol) (**A**) nor pyrogallol oxidation itself (**B**). SOD activity was measured as the ability to inhibit pyrogallol oxidation determined by absorbance at 400 nm after one hr incubation as in

Fig 1.  $\text{Cu}^{\text{II}}$ (atasm) also does not have any effect on pyrogallol oxidation **(C)**.  $\text{ONOO}^-$  was able to inhibit the action of SOD1 (10 U/mL) in a dose dependent manner **(D)**.

**Figure S2.** Effect of  $\text{Cu}^{\text{II}}$ (atasm) on the wild-type (WT) mice dosed at 30mg/kg from 140 days of age till the end of the  $\text{SOD1}^{\text{G93A}}$  mice trial as Fig 2. (A). Percentage of weight changes over initial weight. (B). Rotarod test over the period of the trial. There is no difference between the vehicle and  $\text{Cu}^{\text{II}}$ (atasm) treated mice, indicating that the  $\text{Cu}^{\text{II}}$ (atasm) is well tolerated.

**Figure S3.** (A) A western blot of SOD1 in the 230 days mouse spinal cord homogenates. (B) Quantitation of the SOD1 level. No change in the SOD1 levels was detected between vehicle and  $\text{Cu}^{\text{II}}$ (atasm) treated  $\text{SOD1}^{\text{G93A}}$  mice.

# Suppl Figure 1

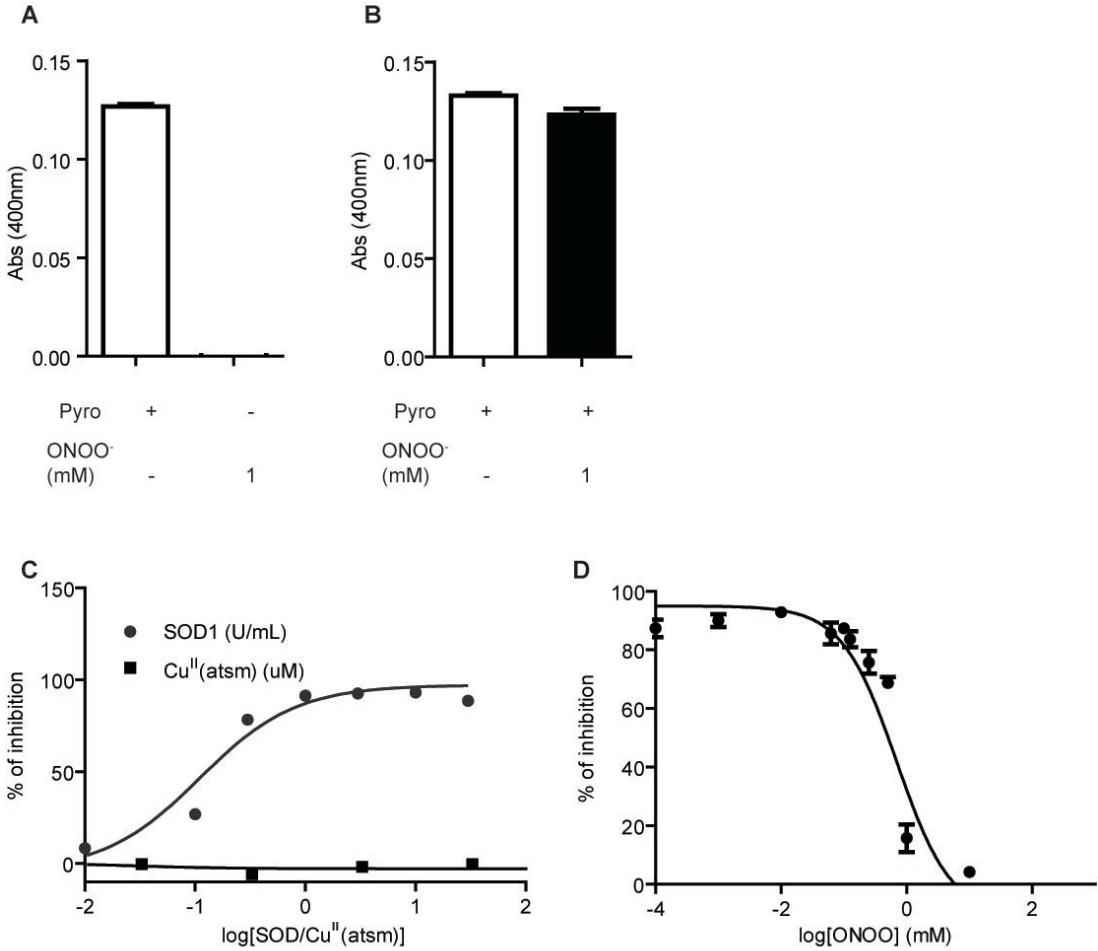

Suppl Figure 2

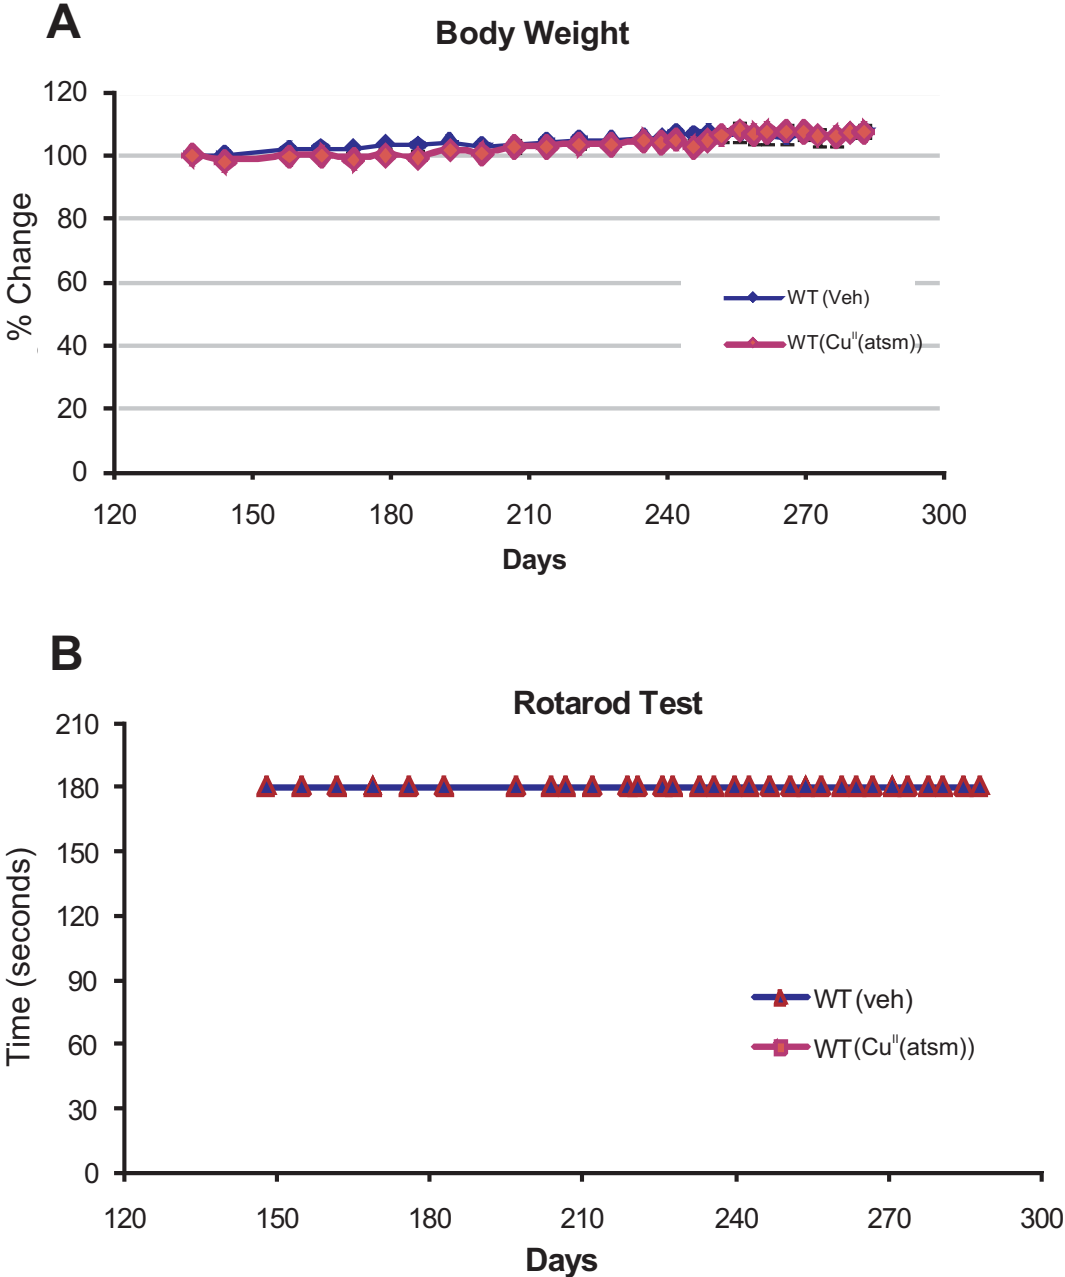

### Supplementary Figure 3

**A**

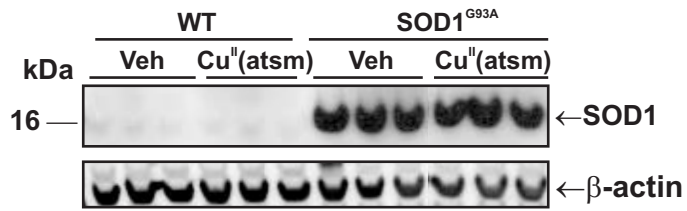

**B**

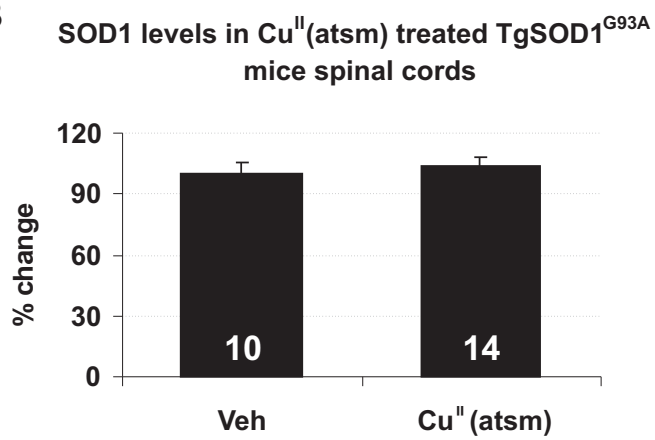

Supplement: supp_M111.274407_jbc.M111.274407-1.pdf [file supp_M111.274407_jbc.M111.274407-1.pdf]
